# Supplementary material
Source: Springer Nature journal article supplement (https://www.springermedizin.de/resource/supplementary/12916_2009_226_MOESM5_ESM.pdf/9599436)

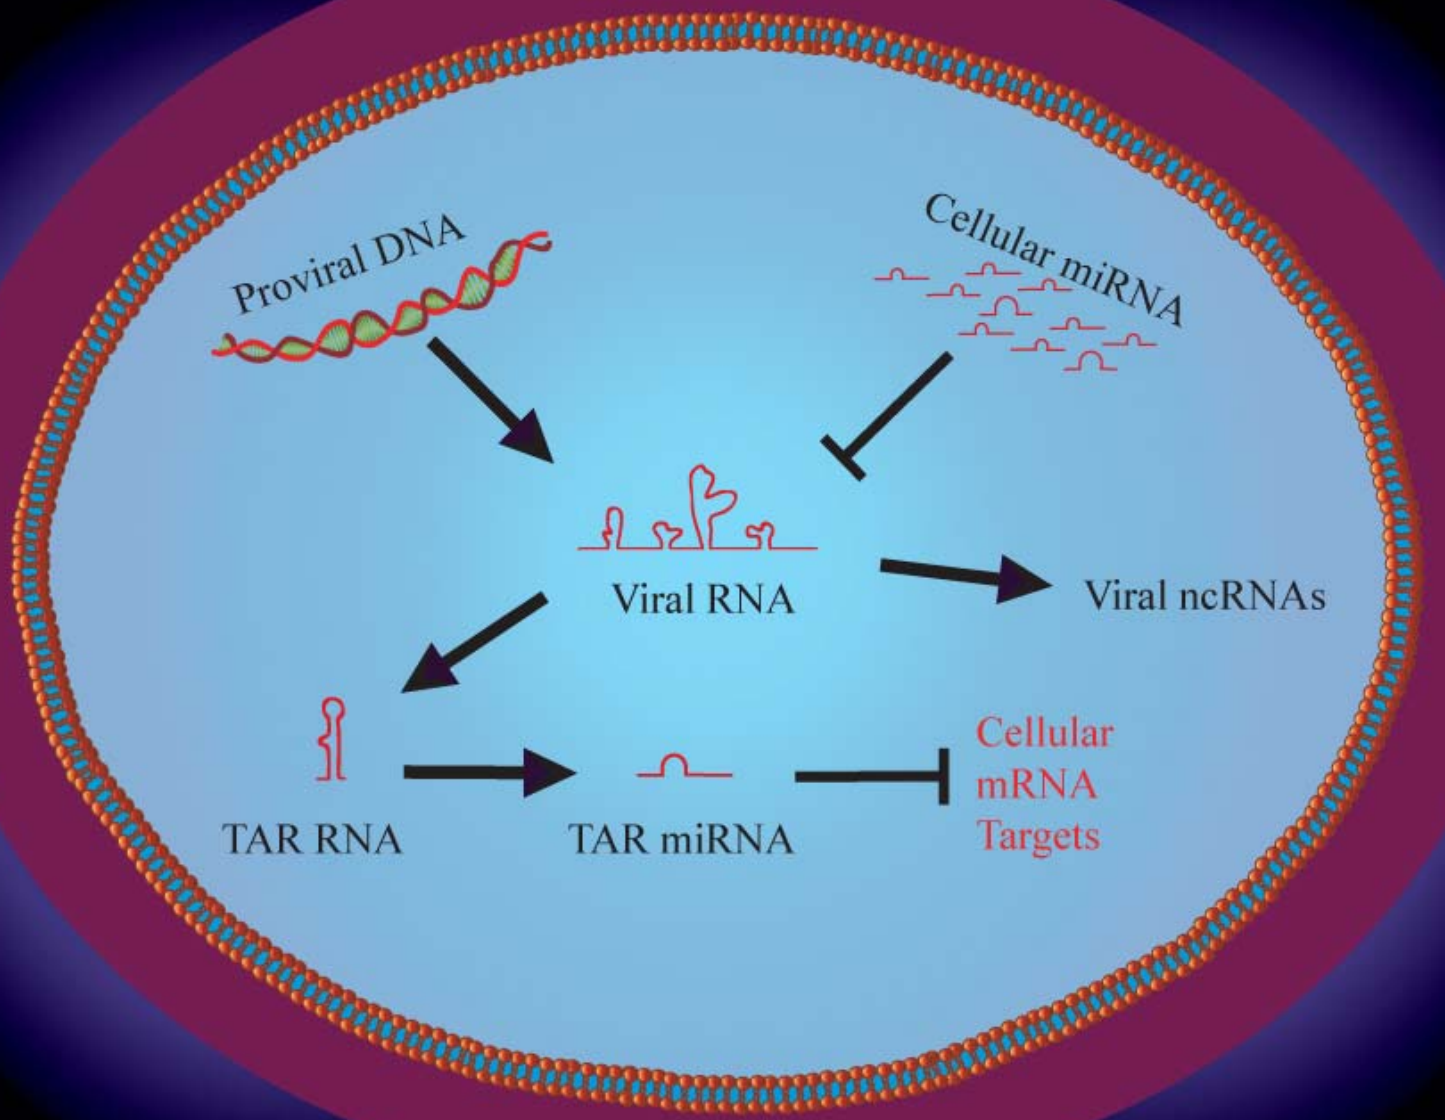

Proviral DNA

Cellular miRNA

Viral RNA

Viral ncRNAs

TAR RNA

TAR miRNA

Cellular mRNA Targets

Supplement: MOESM5 [file 9599436]
